# Supplementary material for: Antitumor Activity and Safety of Dostarlimab Monotherapy in Patients With Mismatch Repair Deficient Solid Tumors: A Nonrandomized Controlled Trial
Source: PubMed Central journal article supplement — JAMA Netw Open. 2023 Nov 2;6(11):e2341165. doi: 10.1001/jamanetworkopen.2023.41165 (PMC10623195; doi:10.1001/jamanetworkopen.2023.41165), 2023-11-02
Supplement: jamanetwopen-e2341165-s003.pdf [file jamanetwopen-e2341165-s003.pdf]

## **Data Sharing Statement**

### **Data**

**Data available:** Yes

**Data types:** Deidentified participant data

**How to access data:** Anonymized individual participant data and study documents can be requested for further research from [www.clinicalstudydatarequest.com](http://www.clinicalstudydatarequest.com)

**When available:** With publication

### **Supporting Documents**

**Document types:** None

### **Additional Information**

**Who can access the data:** Not specified

**Types of analyses:** No specified

**Mechanisms of data availability:** Not specified
